# Supplementary material for: Structure, magnetic properties and DFT calculations of azido-copper(ii) complexes with different azido-bonding, nuclearity and dimensionality
Source: Royal Society of Chemistry journal article supplement (doi:10.1039/c7nj04150k), 2018-01-01
Supplement: c7nj04150k1.pdf [file c7nj04150k1.pdf]

## SUPPLEMENTARY MATERIAL

### Structure, magnetic properties and DFT calculations of azido copper(II)-diamine complexes with different azido-bonding modes, nuclearity and dimensionality

Salah S. Massoud,<sup>\*a</sup> Maher M. Henary,<sup>b</sup> Lindley Maxwell,<sup>c</sup> Alejandro Martín,<sup>c</sup> Eliseo Ruiz,<sup>c</sup> Ramon Vicente,<sup>c\*</sup> Roland C. Fischer,<sup>d</sup> and Franz A. Mautner<sup>\*e</sup>

<sup>a</sup> *Department of Chemistry, University of Louisiana at Lafayette, P.O. Box 43700  
Lafayette, LA 70504, USA*

<sup>b</sup> *Department of Chemistry and Biochemistry, University of California, Los Angeles,  
CA 90095-1569, USA*

<sup>c</sup> *Departament de Química Inorgànica, Universitat de Barcelona, Martí i Franquès 1-11, 08028  
Barcelona, Spain*

<sup>d</sup> *Institut für Anorganische Chemie, Technische Universität Graz, Stremayrgasse 9/V, A-8010  
Graz, Austria*

<sup>e</sup> *Institut für Physikalische and Theoretische Chemie, Technische Universität Graz,  
A-8010 Graz, Austria*

#### Table of Contents

**Table S1.** Selected bond distances (Å) and angles (°) for **1**.

**Table S2.** Selected bond distances (Å) and angles (°) for **2**.

**Table S3.** Selected bond distances (Å) and angles (°) for **3**.

**Table S4.** Selected bond distances (Å) and angles (°) for **4**.

**Table S5.** Hydrogen bond systems for compounds **1** – **4**.

**Fig. S1.** Packing plot of **1**

**Fig. S2.** Packing plot of **2**

**Fig. S3.** Packing plot of **3**

**Fig. S4.** Packing plot of **4**

**Table S1** Selected bond distances (Å) and angles (°) for **1**.

|                    |            |                   |            |
|--------------------|------------|-------------------|------------|
| Cu(1)-N(1)         | 2.096(2)   | Cu(1)-N(21)       | 1.991(2)   |
| Cu(1)-N(2)         | 2.011(2)   | Cu(1)-N(11')      | 2.312(2)   |
| Cu(1)-N(11)        | 1.995(2)   | N(11)-N(12)       | 1.209(3)   |
| N(12)-N(13)        | 1.152(3)   | N(21)-N(22)       | 1.189(3)   |
| N(22)-N(23)        | 1.168(3)   |                   |            |
| Cu(1)-N(11)-Cu(1') | 101.77(9)  | N(2)-Cu(1)-N(11)  | 174.54(9)  |
| N(1)-Cu(1)-N(21)   | 146.90(9)  | Cu(1)-N(11)-N(12) | 125.55(18) |
| Cu(1')-N(11)-N(12) | 125.60(17) | Cu(1)-N(21)-N(22) | 128.48(19) |
| N(13)-N(12)-N(11)  | 177.1(3)   | N(23)-N(22)-N(21) | 176.4(3)   |

Symmetry code: (') -x, -y, 2-z.

**Table S2** Selected bond distances (Å) and angles (°) for **2**.

|                   |            |                   |            |
|-------------------|------------|-------------------|------------|
| Cu(1)-N(1)        | 2.033(3)   | Cu(2)-N(3)        | 2.045(3)   |
| Cu(1)-N(2)        | 2.065(3)   | Cu(2)-N(4)        | 2.056(3)   |
| Cu(1)-N(11)       | 2.309(3)   | Cu(2)-N(11)       | 2.004(2)   |
| Cu(1)-N(21)       | 1.979(3)   | Cu(2)-N(31)       | 2.237(2)   |
| Cu(1)-N(31)       | 2.020(3)   | Cu(2)-N(41)       | 2.018(2)   |
| N(11)-N(12)       | 1.211(4)   | N(12)-N(13)       | 1.150(4)   |
| N(21)-N(22)       | 1.188(4)   | N(22)-N(23)       | 1.162(4)   |
| N(31)-N(32)       | 1.209(4)   | N(32)-N(33)       | 1.137(4)   |
| N(41)-N(42)       | 1.196(4)   | N(42)-N(43)       | 1.163(4)   |
| Cu(1)-N(11)-Cu(2) | 101.77(10) | Cu(1)-N(31)-Cu(2) | 102.51(10) |
| N(1)-Cu(1)-N(31)  | 174.21(10) | N(3)-Cu(2)-N(11)  | 177.28(10) |
| N(2)-Cu(1)-N(21)  | 162.16(11) | N(4)-Cu(2)-N(41)  | 142.83(10) |
| Cu(1)-N(11)-N(12) | 134.8(2)   | Cu(2)-N(11)-N(12) | 120.3(2)   |
| Cu(1)-N(21)-N(22) | 123.0(2)   | Cu(2)-N(31)-N(32) | 132.8(2)   |
| Cu(1)-N(31)-N(32) | 120.0(2)   | Cu(2)-N(41)-N(42) | 120.0(2)   |
| N(13)-N(12)-N(11) | 178.4(3)   | N(23)-N(22)-N(21) | 178.1(3)   |
| N(33)-N(32)-N(31) | 179.1(4)   | N(43)-N(42)-N(41) | 179.1(3)   |

**Table S3** Selected bond distances (Å) and angles (°) for **3**.

|                     |            |                    |            |
|---------------------|------------|--------------------|------------|
| Cu(1)-N(1)          | 2.092(3)   | Cu(2)-N(3)         | 2.067(2)   |
| Cu(1)-N(2)          | 2.012(3)   | Cu(2)-N(4)         | 2.006(3)   |
| Cu(1)-N(11)         | 1.986(3)   | Cu(2)-N(31)        | 1.983(2)   |
| Cu(1)-N(21)         | 2.003(3)   | Cu(2)-N(23)        | 2.290(3)   |
| Cu(1)-N(13')        | 2.350(3)   | Cu(2)-N(33'')      | 1.996(3)   |
| N(11)-N(12)         | 1.191(4)   | N(12)-N(13)        | 1.163(4)   |
| N(21)-N(22)         | 1.189(4)   | N(22)-N(23)        | 1.169(4)   |
| N(31)-N(32)         | 1.176(4)   | N(32)-N(33)        | 1.174(4)   |
| N(1)-Cu(1)-N(21)    | 160.57(11) | N(3)-Cu(2)-N(33')  | 159.14(11) |
| N(2)-Cu(1)-N(11)    | 173.85(11) | N(4)-Cu(2)-N(31)   | 174.59(10) |
| Cu(1)-N(11)-N(12)   | 121.3(2)   | Cu(2)-N(23)-N(22)  | 114.8(2)   |
| Cu(1'')-N(13)-N(12) | 136.5(2)   | Cu(2)-N(31)-N(32)  | 127.4(2)   |
| Cu(1)-N(21)-N(22)   | 129.2(2)   | Cu(2')-N(33)-N(32) | 131.4(2)   |
| N(13)-N(12)-N(11)   | 176.7(3)   | N(23)-N(22)-N(21)  | 176.1(3)   |
| N(33)-N(32)-N(31)   | 174.1(3)   |                    |            |

Symmetrie codes: (') 1-x, 1-y, 1-z; (') 1-x, -y, 1-z.

**Table S4** Selected bond distances (Å) and angles (°) for **4**.

---

|                    |            |                      |            |
|--------------------|------------|----------------------|------------|
| Cu(1)-N(1)         | 2.069(3)   | Cu(1)-N(21)          | 2.022(3)   |
| Cu(1)-N(2)         | 2.010(3)   | Cu(1)-N(11')         | 2.439(3)   |
| Cu(1)-N(11)        | 2.018(3)   | Cu(1)-N(13'')        | 2.510(3)   |
| N(11)-N(12)        | 1.196(4)   | N(12)-N(13)          | 1.155(4)   |
| N(21)-N(22)        | 1.212(4)   | N(22)-N(23)          | 1.155(4)   |
| Cu(1)-N(11)-Cu(1') | 99.64(12)  | N(2)-Cu(1)-N(11)     | 171.19(12) |
| N(1)-Cu(1)-N(21)   | 169.66(12) | N(11')-Cu(1)-N(13'') | 171.12(10) |
| Cu(1)-N(11)-N(12)  | 127.0(2)   | Cu(1)-N(21)-N(22)    | 120.4(2)   |
| Cu(1')-N(11)-N(12) | 131.4(2)   | N(23)-N(22)-N(21)    | 177.6(4)   |
| N(13)-N(12)-N(11)  | 176.9(3)   |                      |            |

Symmetry code: (') -x, 1-y, -z; (") -x, y-1/2, -z+1/2.

**Table S5** Hydrogen bond systems for compounds **1 – 4**.

| D-H...A <sup>a</sup> | Symmetry of A        | D...A (Å) | D-H...A (°) |
|----------------------|----------------------|-----------|-------------|
| <b>Compound 1</b>    |                      |           |             |
| Cu(1)-H(91)...N(23)  | [-x,1-y,2-z]         | 3.033(4)  | 165(3)      |
| <b>Compound 2</b>    |                      |           |             |
| N(1)-H(91)...N(43)   | [3/2-x,1/2+y,1/2-z]  | 3.104(4)  | 170(3)      |
| N(2)-H(92)...N(43)   |                      | 3.182(4)  | 165(3)      |
| N(3)-H(93)...N(23)   | [5/2-x,-1/2+y,1/2-z] | 3.034(4)  | 164(3)      |
| N(4)-H(94)...N(23)   |                      | 3.223(4)  | 150(3)      |
| <b>Compound 3</b>    |                      |           |             |
| N(2)-H(91)...O(1)    | [1-x,1-y,1-z]        | 3.131(4)  | 153(3)      |
| N(4)-H(92)...O(1)    |                      | 3.067(4)  | 168(4)      |
| <b>Compound 4</b>    |                      |           |             |
| N(1)-H(90)...N(23)   | [-x,1/2+y,1/2-z]     | 3.186(5)  | 153(3)      |
| N(1)-H(91)...N(21)   | [-x,1-y,-z]          | 3.184(4)  | 164(3)      |
| N(2)-H(92)...N(21)   | [-x,-y,-z]           | 3.058(4)  | 175(3)      |
| N(2)-H(93)...N(13)   | [x,-1+y,z]           | 3.100(5)  | 166(3)      |

<sup>a)</sup> D = Donor, A = Acceptor

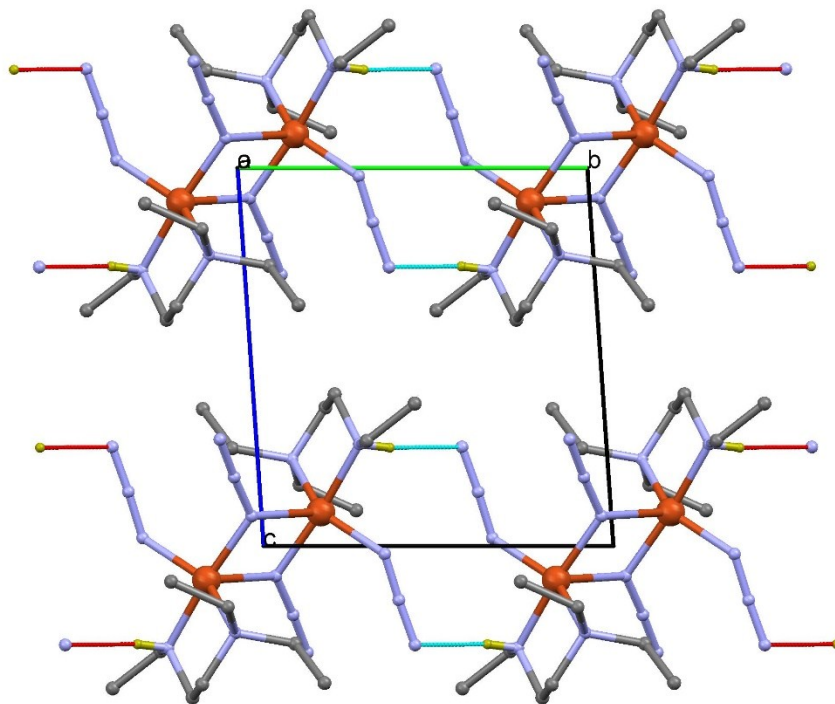

**Fig. S1** Packing plot of 1.

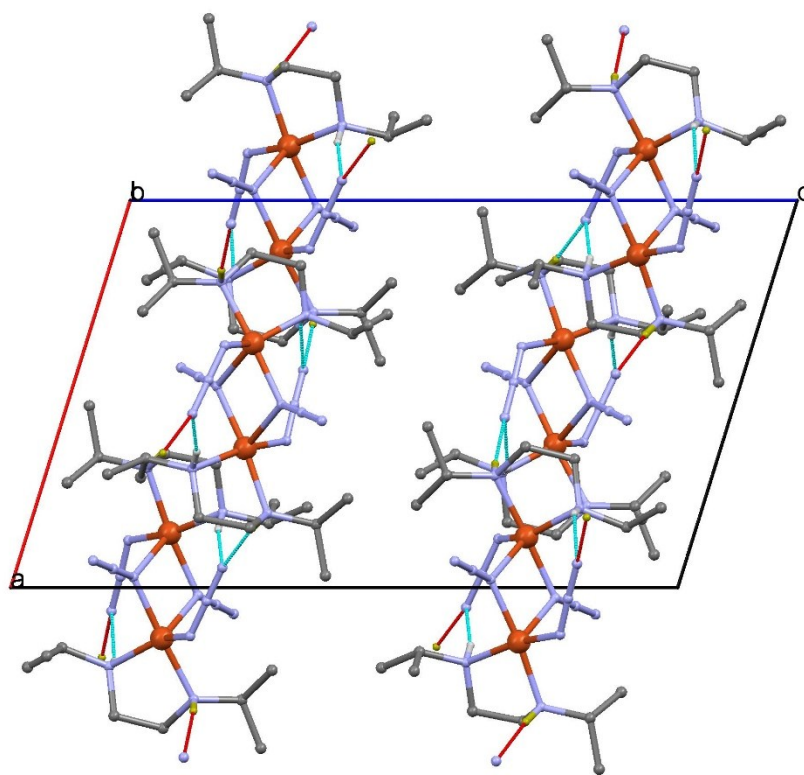

**Fig. S2** Packing plot of 2.

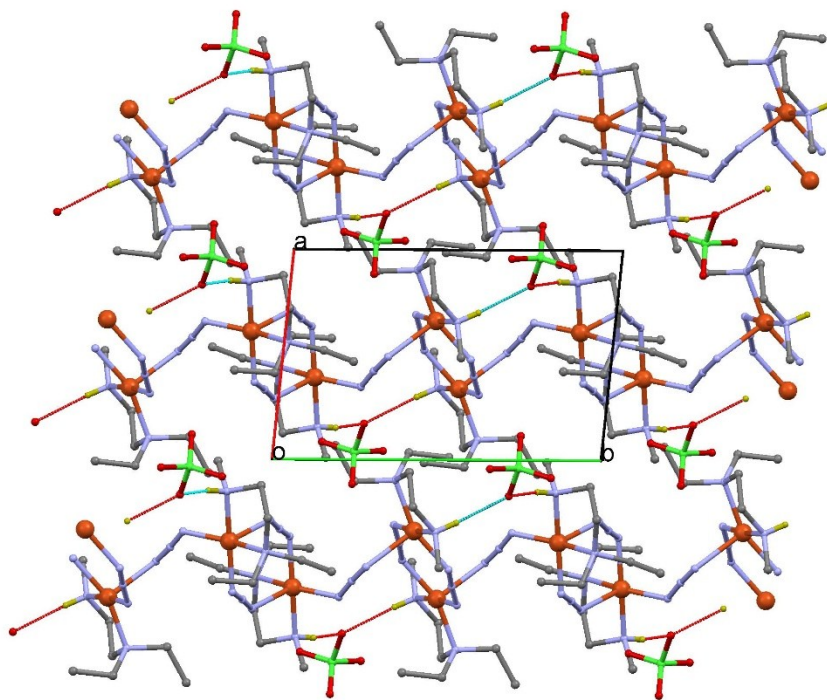

Fig. S3 Packing plot of 3.

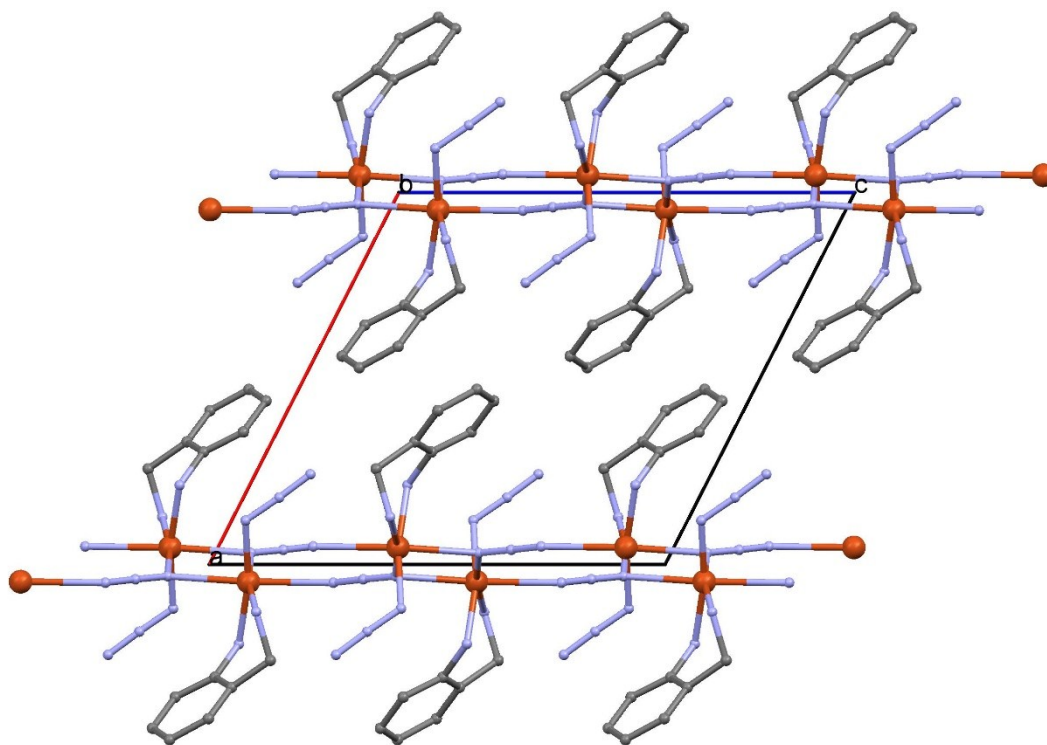

Fig. S4 Packing plot of 4.
